# Supplementary material for: Giant anisotropic photogalvanic effect in a flexible AsSb monolayer with ultrahigh carrier mobility
Source: Royal Society of Chemistry journal article supplement (doi:10.1039/c7cp05201d), 2017-01-01
Supplement: c7cp05201d1.pdf [file c7cp05201d1.pdf]

## Giant anisotropic photogalvanic effect in flexible AsSb monolayer with ultrahigh carrier mobility

Pei Zhao,<sup>†</sup> Jianwei Li,<sup>‡</sup> Wei Wei,<sup>†</sup> Qilong Sun,<sup>†</sup> Hao Jin,<sup>\*,‡</sup> Baibiao Huang,<sup>†</sup> and Ying

Dai<sup>\*,†</sup>

School of Physics, State Key Laboratory of Crystal Materials, Shandong University,

Jinan 250100, People's Republic of China

College of Physics and Energy, Shenzhen University, Shenzhen 518060, People's

Republic of China.

Hao Jin (H. J.) [jh@szu.edu.cn](mailto:jh@szu.edu.cn)

Ying Dai (Y. D.) [daiy60@sina.com](mailto:daiy60@sina.com)

**Tables S1.** Optimized structural parameters and of AsSb allotropes (as shown in Figure 1) at the PBE theoretical level.

| Phase  | Lattice Constant<br>(Å) |      | Bond length<br>(Å) |                |                | Angle<br>(°)   |                | Formation<br>energy<br>(eV/atom) |
|--------|-------------------------|------|--------------------|----------------|----------------|----------------|----------------|----------------------------------|
|        | a                       | b    | d <sub>1</sub>     | d <sub>2</sub> | d <sub>3</sub> | θ <sub>1</sub> | θ <sub>2</sub> |                                  |
| α-AsSb | 4.75                    | 4.04 | 2.67               | 2.72           | —              | 97.30          | 98.34          | -2.78                            |
| γ-AsSb | 6.24                    | 3.85 | 2.68               | 2.78           | —              | 97.43          | 97.33          | -2.75                            |
| ε-AsSb | 6.78                    | 7.23 | 2.67               | 2.72           | 2.72           | 83.49          | 99.34          | -2.70                            |

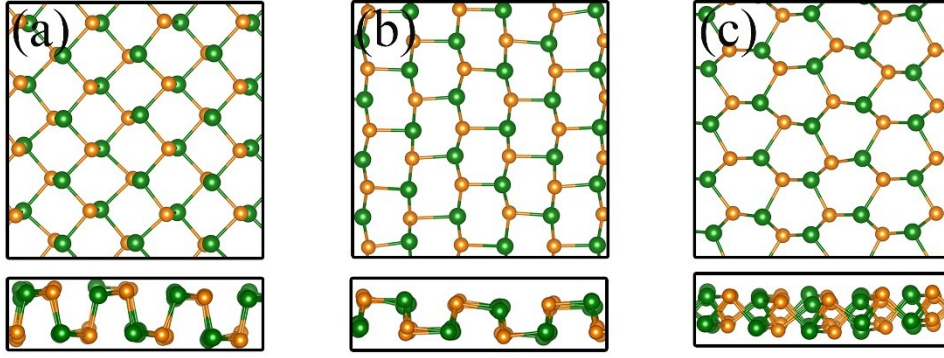

**Figures S1.** Top and side views of (a)  $\alpha$ -AsSb, (b)  $\gamma$ -AsSb and (c)  $\epsilon$ -AsSb monolayer snapshotted from the molecules dynamic simulation at the temperature of 300 K.

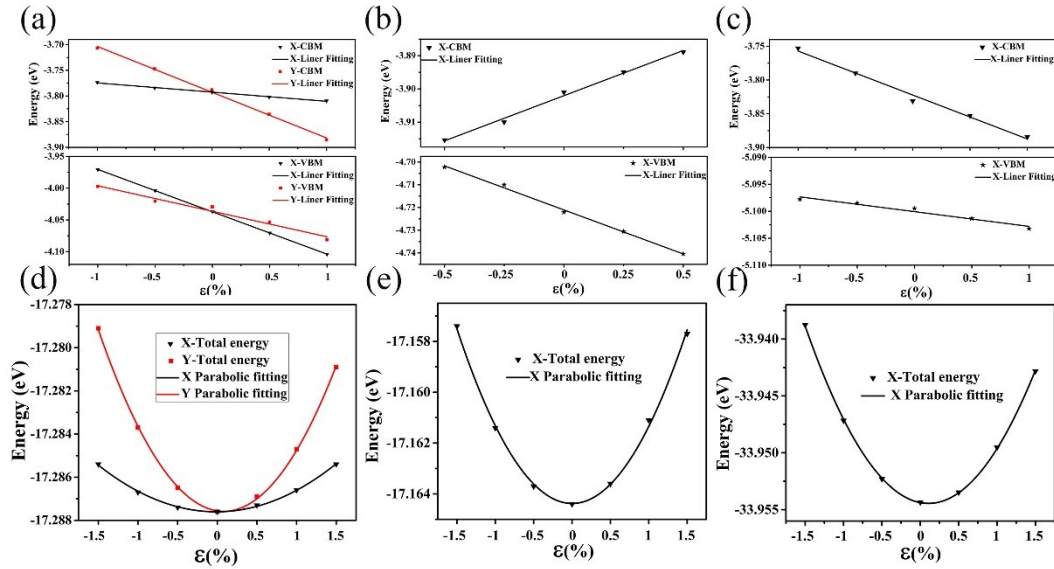

**Figures S2.** Band edges and total energy as a function of uniaxial strain. (a), (b) and (c) are the linear fitting of band edges and (d), (e) and (f) are the quadratic fitting of total energy for  $\alpha$ -AsSb,  $\gamma$ -AsSb and  $\epsilon$ -AsSb respectively.
